# Supplementary material
Source: MDPI journal article supplement (https://www.mdpi.com/2571-6131/3/1/10)
Supplement: s1 [file s1]

## Supporting Information

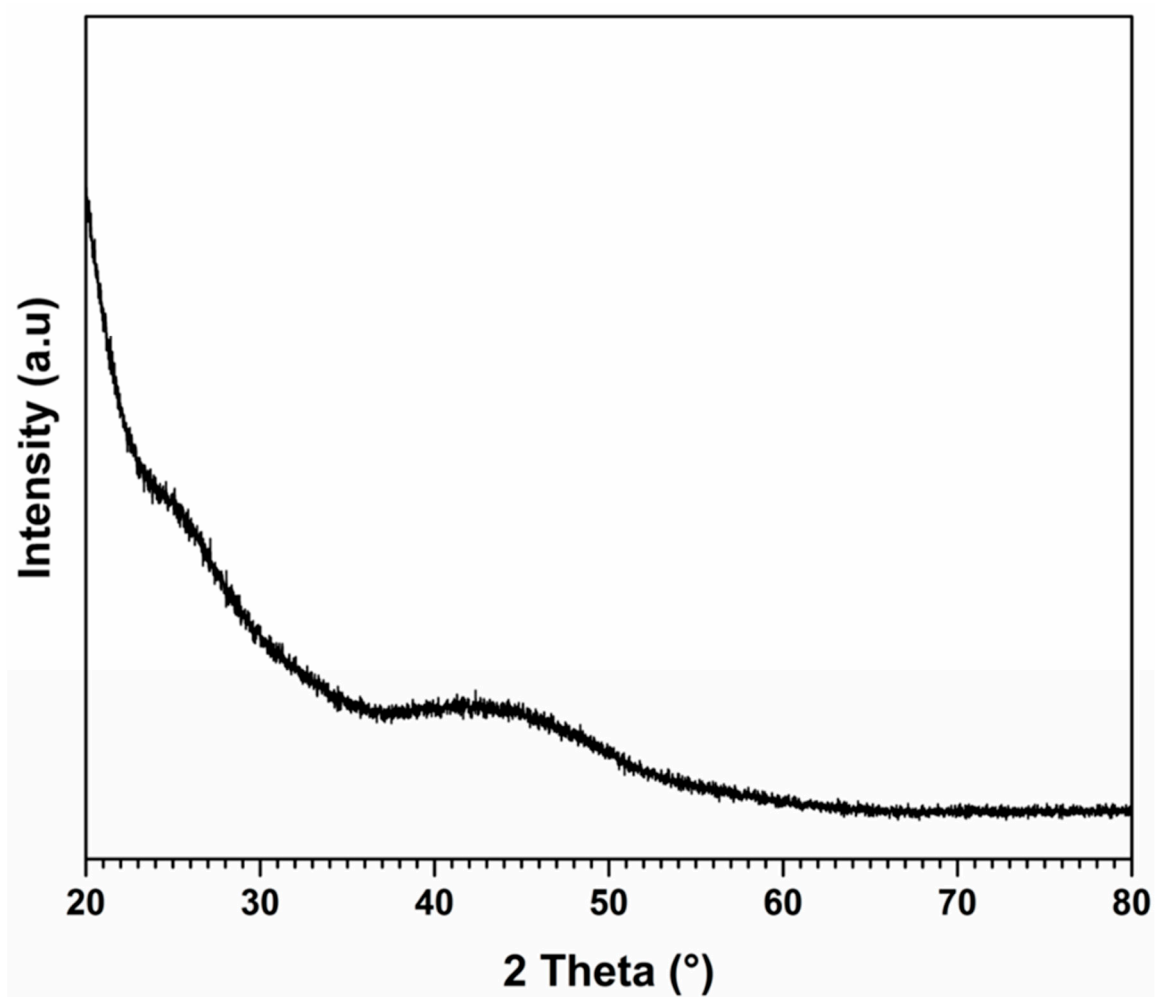

**Figure S1:** XRD pattern of the polymethylmethacrylate sample holder.

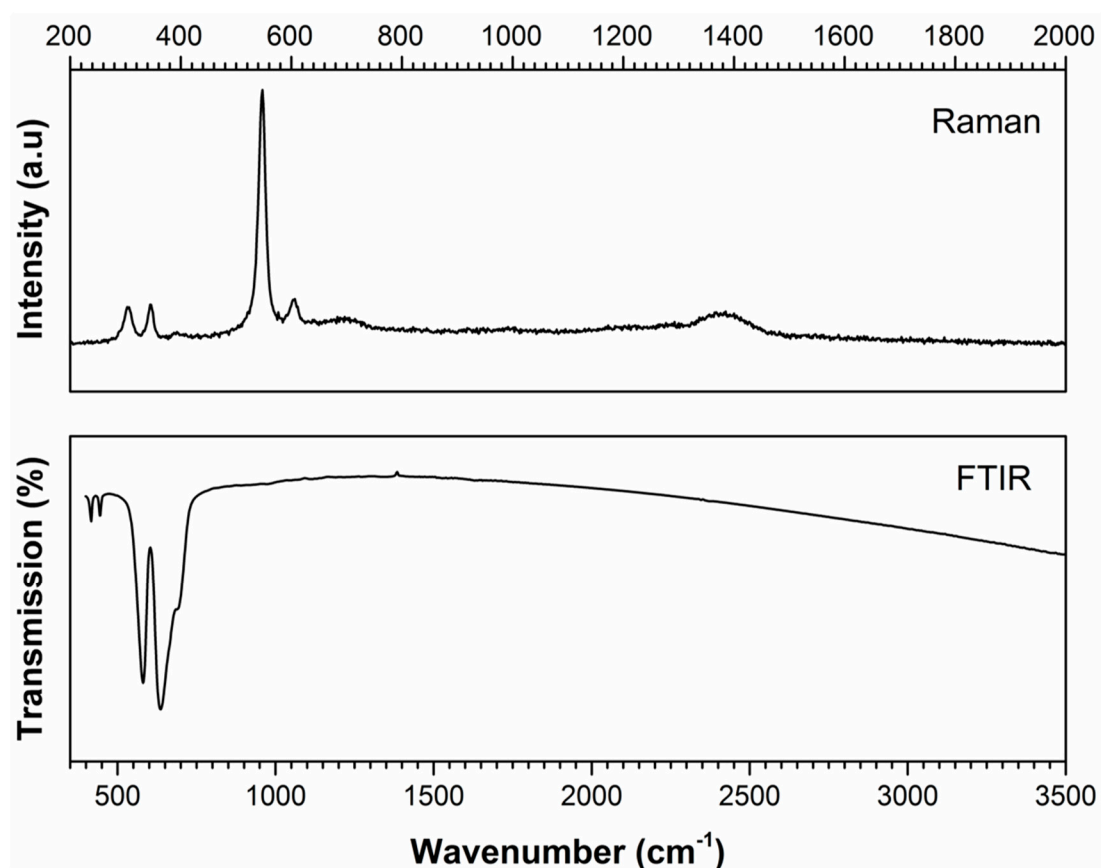

**Figure S2:** Raman and FTIR spectra of a commercial  $\text{Cr}_2\text{O}_3$  nanopowder (99.9%).

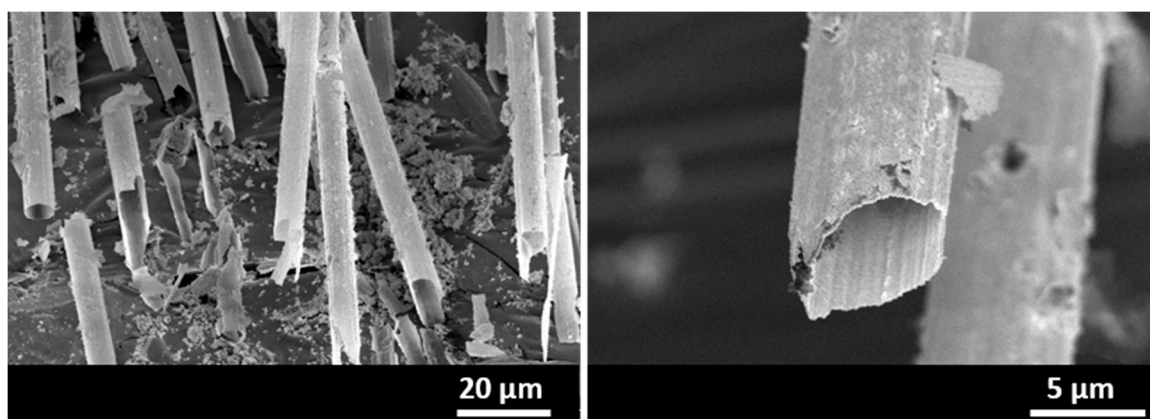

**Figure S3:** SEM pictures of  $\text{Cr}_2\text{O}_3$  hollow fibers synthesized by means of a replication method. Micron-sized carbon fibers were selected as a templating agent.
